# Supplementary material for: Single crystal-to-single crystal transformation – from two distinct to three distinct spin crossover centers in 2D coordination polymer [Fe(bbtr)3](CF3SO3)2
Source: Royal Society of Chemistry journal article supplement (doi:10.1039/d1dt03578a), 2021-12-06
Supplement: d1dt03578a1.pdf [file d1dt03578a1.pdf]

**Single crystal-to-single crystal transformation – from two distinct to three distinct spin crossover centers in 2D coordination polymer [Fe(bbtr)<sub>3</sub>](CF<sub>3</sub>SO<sub>3</sub>)<sub>2</sub>**

Maria Książek,<sup>[a]\*</sup> Marek Weselski,<sup>[b]</sup> Joachim Kusz,<sup>[a]</sup> Robert Bronisz<sup>[b]\*</sup>

<sup>a</sup> Institute of Physics, University of Silesia, 75 Pułku Piechoty 1, 41-500 Chorzów, Poland.

<sup>b</sup> Faculty of Chemistry, University of Wrocław, F. Joliot-Curie 14, 50-383, Wrocław, Poland

**Table S1.** Crystallographic data for crystal structures of **1** (before conversion) determined at 300 and 100 K.

| T/K                                                                   | 300                                                                                            | 100                                                               |            |
|-----------------------------------------------------------------------|------------------------------------------------------------------------------------------------|-------------------------------------------------------------------|------------|
| CCDC number                                                           | 2116786                                                                                        | 2116787                                                           |            |
| Chemical formula                                                      | C <sub>26</sub> H <sub>36</sub> F <sub>6</sub> FeN <sub>18</sub> O <sub>6</sub> S <sub>2</sub> |                                                                   |            |
| Formula Mass                                                          | 930.70                                                                                         |                                                                   |            |
| Crystal system                                                        | Trigonal                                                                                       |                                                                   |            |
| Space group                                                           | R -3                                                                                           |                                                                   |            |
| Z                                                                     | 9                                                                                              |                                                                   |            |
| Unit cell dimensions                                                  |                                                                                                |                                                                   |            |
| <i>a</i> /Å                                                           | 19.5718(3)                                                                                     | 19.0003(2)                                                        |            |
| <i>c</i> /Å                                                           | 28.7483(7)                                                                                     | 28.6098(5)                                                        |            |
| Unit cell volume/Å <sup>3</sup>                                       | 9536.8(4)                                                                                      | 8944.7(3)                                                         |            |
| F(000)                                                                | 4302                                                                                           | 4302                                                              |            |
| <i>D<sub>x</sub></i> (Mg m <sup>-3</sup> )                            | 1.458                                                                                          | 1.555                                                             |            |
| μ (mm <sup>-1</sup> )                                                 | 0.541                                                                                          | 0.577                                                             |            |
| Theta range for data collection/°                                     | 2.975 to 26.364                                                                                | 3.027 to 26.367                                                   |            |
| Completeness                                                          | theta = 25.242°<br>99.8 %                                                                      | theta = 25.242°<br>99.8 %                                         |            |
| Range of <i>h, k, l</i>                                               | -24 ≤ <i>h</i> ≤ 24<br>-15 ≤ <i>k</i> ≤ 24<br>-35 ≤ <i>l</i> ≤ 35                              | -23 ≤ <i>h</i> ≤ 23<br>-14 ≤ <i>k</i> ≤ 23<br>-35 ≤ <i>l</i> ≤ 35 |            |
| No. of measured reflections                                           | 23729                                                                                          | 21853                                                             |            |
| No. of independent reflections                                        | 4339                                                                                           | 4060                                                              |            |
| <i>R</i> <sub>int</sub>                                               | 0.0367                                                                                         | 0.0255                                                            |            |
| Data / restraints / parameters                                        | 4339 / 26 / 351                                                                                | 4060 / 26 / 333                                                   |            |
| Goodness-of-fit on F <sup>2</sup>                                     | 1.042                                                                                          | 1.047                                                             |            |
| Final <i>R</i> <sub>1</sub> values ( <i>I</i> > 2σ( <i>I</i> ))       | 0.0490                                                                                         | 0.0231                                                            |            |
| Final <i>wR</i> (F <sup>2</sup> ) values ( <i>I</i> > 2σ( <i>I</i> )) | 0.1213                                                                                         | 0.0552                                                            |            |
| Final <i>R</i> <sub>1</sub> values (all data)                         | 0.0638                                                                                         | 0.0242                                                            |            |
| Final <i>wR</i> (F <sup>2</sup> ) values (all data)                   | 0.1309                                                                                         | 0.0557                                                            |            |
| Largest diff. peak and hole/eÅ <sup>3</sup>                           | 0.480 and -0.290                                                                               | 0.190 and -0.184                                                  |            |
| disorder - ligand                                                     | 0.48(3):0.52(3)                                                                                | 0.373(4):0.627(4)                                                 |            |
| disorder - triflate                                                   | 0.591(6):0.409(6)                                                                              | 0.886(2):0.114(2)                                                 |            |
| BASF                                                                  | 0.524(2)                                                                                       | 0.523(1)                                                          |            |
| d (Fe – N) / Å                                                        | Fe2 – N3                                                                                       | 2.192(3)                                                          | 1.9871(13) |
|                                                                       | Fe2 – N13                                                                                      | 2.178(3)                                                          | 1.9828(14) |
|                                                                       | Fe1 – N23                                                                                      | 2.195(3)                                                          | 1.9933(13) |

**Table S2.** Crystallographic data for crystal structures of **1c** (after conversion) determined at 100 and 280K.

| T/K                                             | 100                                                                  | 280                                                                  |           |
|-------------------------------------------------|----------------------------------------------------------------------|----------------------------------------------------------------------|-----------|
| CCDC number                                     | 2116788                                                              | 2116789                                                              |           |
| Chemical formula                                | $C_{26}H_{36}F_6FeN_{18}O_6S_2$                                      |                                                                      |           |
| Formula Mass                                    | 930.70                                                               |                                                                      |           |
| Crystal system                                  | Hexagonal                                                            |                                                                      |           |
| Space group                                     | P $6_3$                                                              |                                                                      |           |
| Z                                               | 6                                                                    |                                                                      |           |
| Unit cell dimensions                            |                                                                      |                                                                      |           |
| $a/\text{\AA}$                                  | 19.04230(10)                                                         | 19.5869(3)                                                           |           |
| $c/\text{\AA}$                                  | 19.1734(2)                                                           | 19.0349(6)                                                           |           |
| Unit cell volume/ $\text{\AA}^3$                | 6021.00(9)                                                           | 6324.3(3)                                                            |           |
| F(000)                                          | 2868                                                                 | 2868                                                                 |           |
| $D_x$ ( $\text{Mg m}^{-3}$ )                    | 1.540                                                                | 1.466                                                                |           |
| $\mu$ ( $\text{mm}^{-1}$ )                      | 4.806                                                                | 4.575                                                                |           |
| Theta range for data collection/ $^\circ$       | 4.806 to 73.555                                                      | 4.515 to 73.843                                                      |           |
| Completeness                                    | theta = 67.684 $^\circ$<br>99.5 %                                    | theta = 67.684 $^\circ$<br>99.5 %                                    |           |
| Range of $h, k, l$                              | $-19 \leq h \leq 23$<br>$-22 \leq k \leq 23$<br>$-23 \leq l \leq 23$ | $-19 \leq h \leq 24$<br>$-23 \leq k \leq 24$<br>$-23 \leq l \leq 23$ |           |
| No. of measured reflections                     | 42832                                                                | 45063                                                                |           |
| No. of independent reflections                  | 7986                                                                 | 8386                                                                 |           |
| $R_{int}$                                       | 0.0397                                                               | 0.0599                                                               |           |
| Data / restraints / parameters                  | 7986 / 39 / 535                                                      | 8386 / 268 / 536                                                     |           |
| Goodness-of-fit on $F^2$                        | 1.047                                                                | 1.262                                                                |           |
| Final $R_1$ values ( $I > 2\sigma(I)$ )         | 0.0787                                                               | 0.1022                                                               |           |
| Final $wR(F^2)$ values ( $I > 2\sigma(I)$ )     | 0.2153                                                               | 0.2455                                                               |           |
| Final $R_1$ values (all data)                   | 0.0878                                                               | 0.1691                                                               |           |
| Final $wR(F^2)$ values (all data)               | 0.2327                                                               | 0.2975                                                               |           |
| Largest diff. peak and hole/ $e\text{\AA}^{-3}$ | 3.089 and -0.479                                                     | 2.373 and -0.524                                                     |           |
| disorder - triflate                             | 0.409(8):0.591(8)<br>0.480(9):0.520(9)                               | 0.523(5):0.245(4):0.232(4)<br>0.463(4):0.537(4)                      |           |
| BASF                                            | 0.499(4)                                                             | 0.479(5)                                                             |           |
| d (Fe – N) / $\text{\AA}$                       | Fe1 – N3A                                                            | 1.995(7)                                                             | 2.213(9)  |
|                                                 | Fe1 – N3B                                                            | 2.001(6)                                                             | 2.174(9)  |
|                                                 | Fe2 – N3C                                                            | 1.967(7)                                                             | 2.207(11) |
|                                                 | Fe2 – N3D                                                            | 1.999(7)                                                             | 2.167(12) |
|                                                 | Fe3 – N3E                                                            | 2.016(7)                                                             | 2.174(11) |
|                                                 | Fe3 – N3F                                                            | 1.958(2)                                                             | 2.184(13) |

**Table S3.** Crystallographic data for crystal structures of **1** (before conversion) determined at 14 K and as result of light irradiation (520 nm) at 14 K.

| T/K                                             | 14                                                                   | 14                                                                   |          |
|-------------------------------------------------|----------------------------------------------------------------------|----------------------------------------------------------------------|----------|
| CCDC number                                     | 2116790                                                              | 2116791                                                              |          |
| Chemical formula                                | $C_{26}H_{36}F_6FeN_{18}O_6S_2$                                      |                                                                      |          |
| Formula Mass                                    | 930.70                                                               |                                                                      |          |
| Crystal system                                  | Trigonal                                                             |                                                                      |          |
| Space group                                     | R -3                                                                 |                                                                      |          |
| Z                                               | 9                                                                    |                                                                      |          |
| Unit cell dimensions                            |                                                                      |                                                                      |          |
| $a/\text{\AA}$                                  | 18.9537(3)                                                           | 19.3002(4)                                                           |          |
| $c/\text{\AA}$                                  | 28.4241(6)                                                           | 28.2386(9)                                                           |          |
| Unit cell volume/ $\text{\AA}^3$                | 8843.1(3)                                                            | 9109.6(5)                                                            |          |
| F(000)                                          | 4302                                                                 | 4302                                                                 |          |
| $D_x$ ( $\text{Mg m}^{-3}$ )                    | 1.573                                                                | 1.527                                                                |          |
| $\mu$ ( $\text{mm}^{-1}$ )                      | 0.583                                                                | 0.566                                                                |          |
| Theta range for data collection/ $^\circ$       | 2.583 to 26.356                                                      | 2.832 to 26.367                                                      |          |
| Completeness                                    | theta = 25.242°<br>99.6 %                                            | theta = 25.242°<br>99.8 %                                            |          |
| Range of $h, k, l$                              | -22 $\leq h \leq$ 22<br>-23 $\leq k \leq$ 23<br>-35 $\leq l \leq$ 35 | -24 $\leq h \leq$ 23<br>-24 $\leq k \leq$ 24<br>-35 $\leq l \leq$ 35 |          |
| No. of measured reflections                     | 20192                                                                | 20171                                                                |          |
| No. of independent reflections                  | 4017                                                                 | 4135                                                                 |          |
| $R_{int}$                                       | 0.0260                                                               | 0.0366                                                               |          |
| Data / restraints / parameters                  | 4017 / 38 / 339                                                      | 4135 / 38 / 333                                                      |          |
| Goodness-of-fit on $F^2$                        | 1.043                                                                | 1.055                                                                |          |
| Final $R_1$ values ( $I > 2\sigma(I)$ )         | 0.0414                                                               | 0.0486                                                               |          |
| Final $wR(F^2)$ values ( $I > 2\sigma(I)$ )     | 0.1078                                                               | 0.1267                                                               |          |
| Final $R_1$ values (all data)                   | 0.0428                                                               | 0.0505                                                               |          |
| Final $wR(F^2)$ values (all data)               | 0.1093                                                               | 0.1289                                                               |          |
| Largest diff. peak and hole/ $e\text{\AA}^{-3}$ | 2.154 and -0.946                                                     | 1.977 and -1.087                                                     |          |
| disorder - ligand                               | 0.477(7):0.523(7)                                                    | 0.470(9):0.530(9)                                                    |          |
| disorder - triflate                             | 0.749(3):0.251(3)                                                    | 0.796(3):0.204(3)                                                    |          |
| BASF                                            | 0.529(2)                                                             | 0.535(2)                                                             |          |
| d (Fe – N) / $\text{\AA}$                       |                                                                      |                                                                      |          |
|                                                 | Fe2 – N3                                                             | 1.987(2)                                                             | 2.193(3) |
|                                                 | Fe2 – N13                                                            | 1.978(3)                                                             | 2.165(3) |
|                                                 | Fe1 – N23                                                            | 1.992(2)                                                             | 2.187(2) |

**Table S4.** Crystallographic data for crystal structures of **1c** (after conversion) determined at 14 K and as result of light irradiation (520 nm) at 14 K.

| T/K                                             | 14                                                                         | 14                                                                   |
|-------------------------------------------------|----------------------------------------------------------------------------|----------------------------------------------------------------------|
| CCDC number                                     | 2116792                                                                    | 2116793                                                              |
| Chemical formula                                | $C_{26}H_{36}F_6FeN_{18}O_6S_2$                                            |                                                                      |
| Formula Mass                                    | 930.70                                                                     |                                                                      |
| Crystal system                                  | Hexagonal                                                                  |                                                                      |
| Space group                                     | P 6 <sub>3</sub>                                                           |                                                                      |
| Z                                               | 6                                                                          |                                                                      |
| Unit cell dimensions                            |                                                                            |                                                                      |
| $a/\text{\AA}$                                  | 19.0500(2)                                                                 | 19.4504(3)                                                           |
| $c/\text{\AA}$                                  | 19.0504(4)                                                                 | 18.7290(4)                                                           |
| Unit cell volume/ $\text{\AA}^3$                | 5987.18(19)                                                                | 6136.3(2)                                                            |
| F(000)                                          | 2868                                                                       | 2868                                                                 |
| $D_x$ (Mg m <sup>-3</sup> )                     | 1.549                                                                      | 1.511                                                                |
| $\mu$ (mm <sup>-1</sup> )                       | 0.574                                                                      | 0.560                                                                |
| Theta range for data collection/ $^\circ$       | 2.391 to 38.104                                                            | 2.360 to 38.154                                                      |
| Completeness                                    | theta = 25.242°<br>95.6 %                                                  | theta = 25.242°<br>96.0 %                                            |
| Range of $h, k, l$                              | -32 ≤ $h$ ≤ 31<br>-32 ≤ $k$ ≤ 32<br>-20 ≤ $l$ ≤ 20                         | -32 ≤ $h$ ≤ 31<br>-32 ≤ $k$ ≤ 32<br>-20 ≤ $l$ ≤ 20                   |
| No. of measured reflections                     | 72967                                                                      | 88268                                                                |
| No. of independent reflections                  | 17049                                                                      | 17647                                                                |
| $R_{int}$                                       | 0.0411                                                                     | 0.1207                                                               |
| Data / restraints / parameters                  | 17049 / 58 / 493                                                           | 17647 / 257 / 543                                                    |
| Goodness-of-fit on $F^2$                        | 1.028                                                                      | 1.019                                                                |
| Final $R_1$ values ( $I > 2\sigma(I)$ )         | 0.1025                                                                     | 0.1048                                                               |
| Final $wR(F^2)$ values ( $I > 2\sigma(I)$ )     | 0.2738                                                                     | 0.2741                                                               |
| Final $R_1$ values (all data)                   | 0.1351                                                                     | 0.1677                                                               |
| Final $wR(F^2)$ values (all data)               | 0.3124                                                                     | 0.3437                                                               |
| Largest diff. peak and hole/ $e\text{\AA}^{-3}$ | 3.317 and -1.478                                                           | 3.039 and -0.725                                                     |
| disorder - triflate                             | 0.398(8):0.602(8)<br>0.521(9):0.479(9)                                     | 0.282(7):0.559(7):0.158(5)<br>0.528(6):0.472(5)                      |
| BASF                                            | 0.510(3)                                                                   | 0.514(4)                                                             |
| d (Fe – N) / $\text{\AA}$                       | Fe1 – N3A<br>Fe1 – N3B<br>Fe2 – N3C<br>Fe2 – N3D<br>Fe3 – N3E<br>Fe3 – N3F | 1.983(6)<br>2.005(6)<br>1.996(6)<br>1.992(6)<br>2.019(7)<br>1.980(6) |
|                                                 |                                                                            | 2.183(7)<br>2.179(7)<br>2.190(7)<br>2.169(8)<br>2.208(8)<br>2.167(7) |

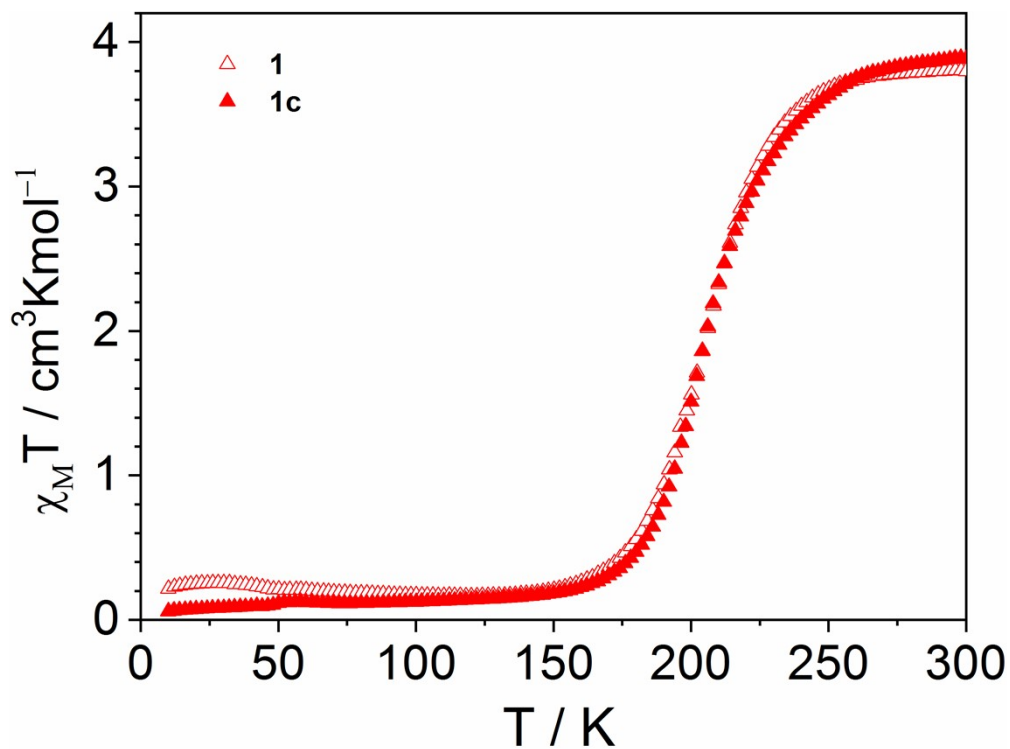

**Figure S1.**  $\chi_M T(T)$  dependences recorded in heating mode for **1** (filled triangles) and **1c** (open triangles) after putting on insert in magnetometer chamber cooled to 10 K.

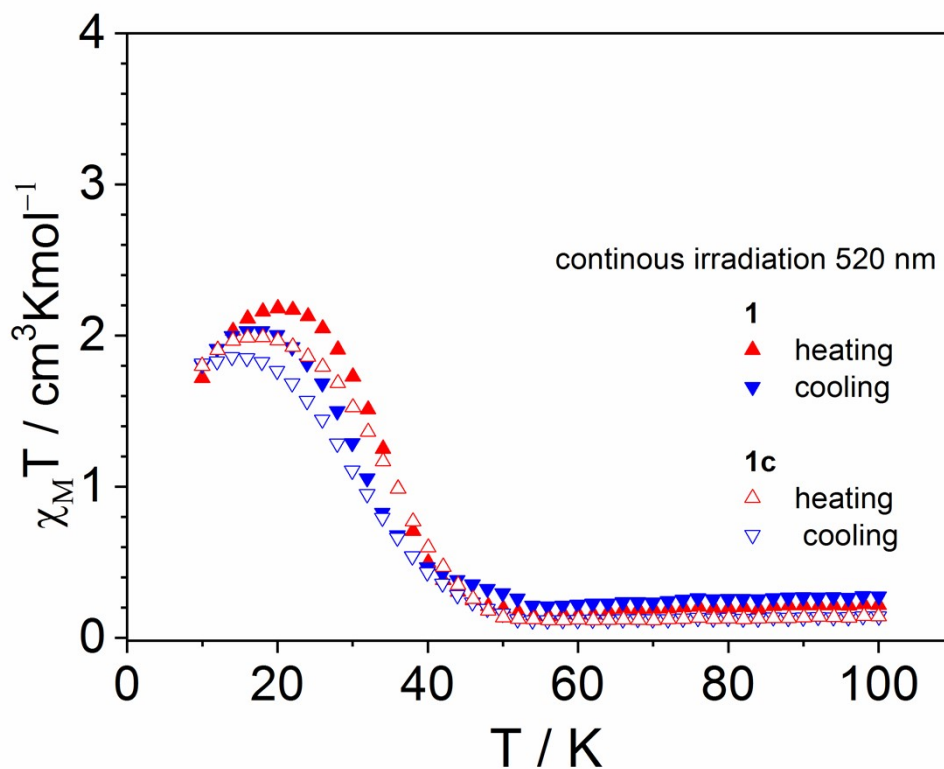

**Figure S2.**  $\chi_M T(T)$  dependences recorded under continuous light irradiation  $\lambda = 520$  nm (LITH experiments) for **1** (filled triangles) and **1c** (open triangles). Red – heating; blue – cooling.

295 K (freshly prepared,  $^{57}\text{Fe}$  enriched)

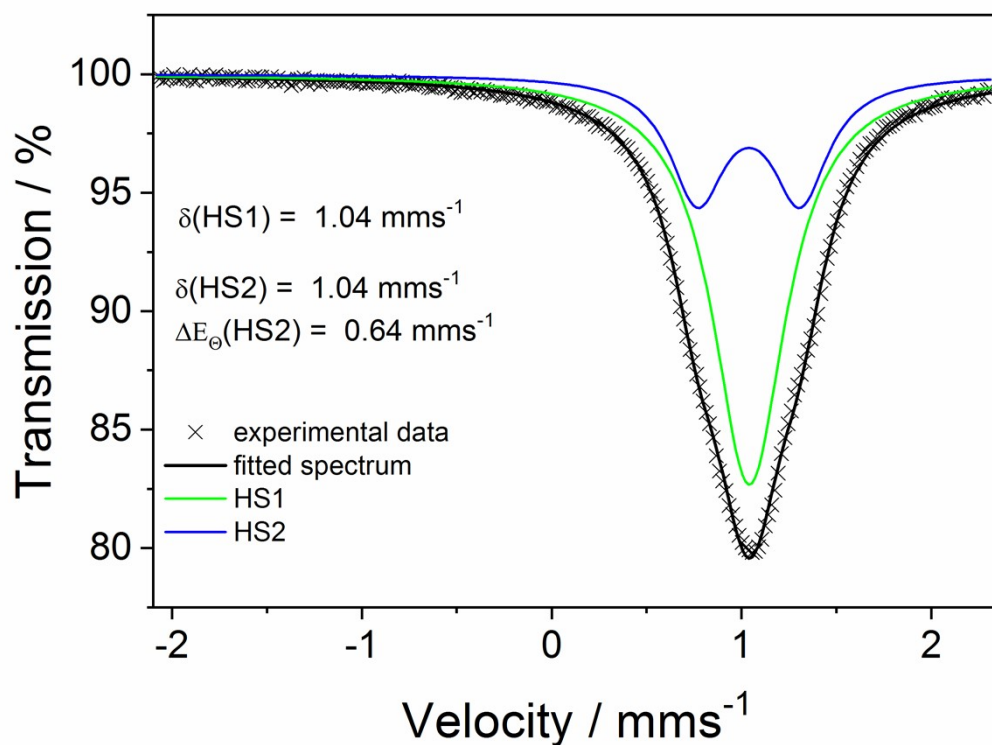

a)

295 K (after 1 year,  $^{57}\text{Fe}$  enriched)

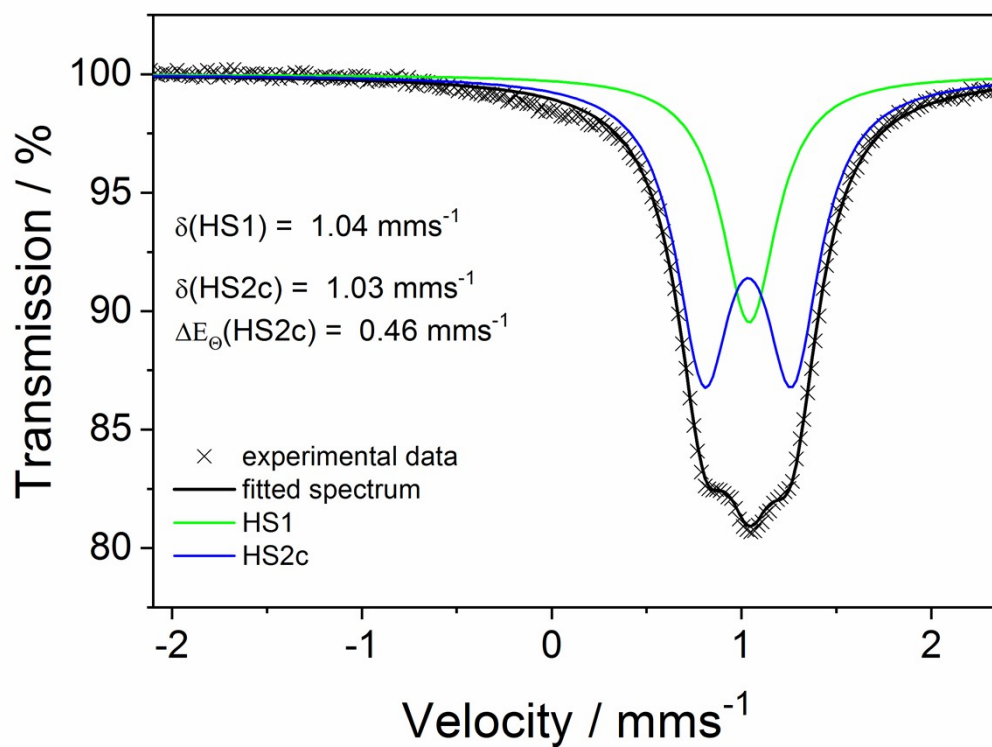

b)

**Figure S3.** Mössbauer spectra (295 K) for  $^{57}\text{Fe}$  enriched **1** (a) and **1c** (b).

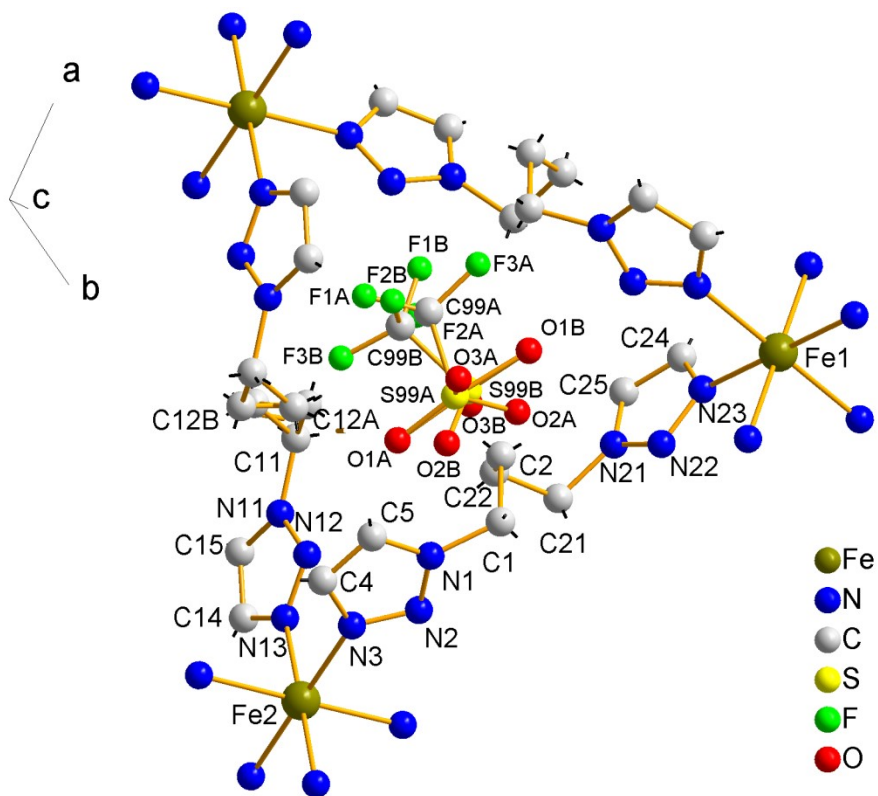

a)

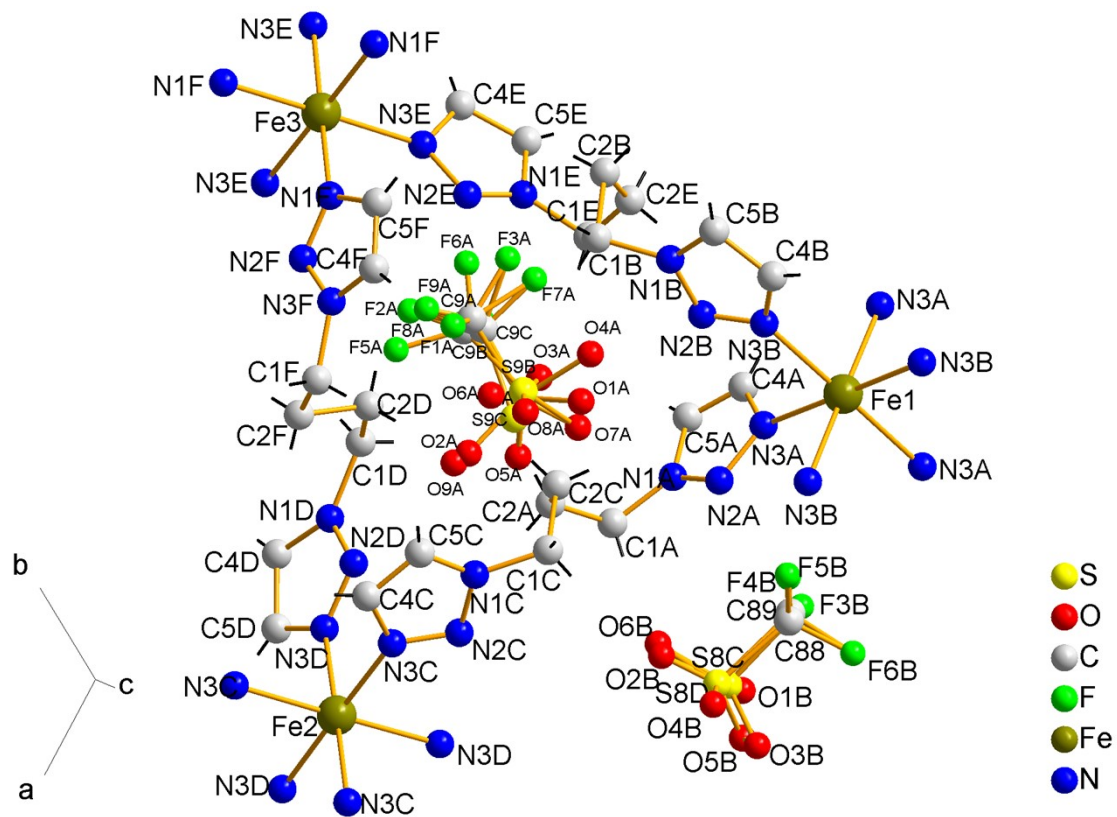

b)

**Figure S4.** Fragments of the polymeric layers in **1** (a) and **1c** (b) together with labelled atoms forming asymmetric units.

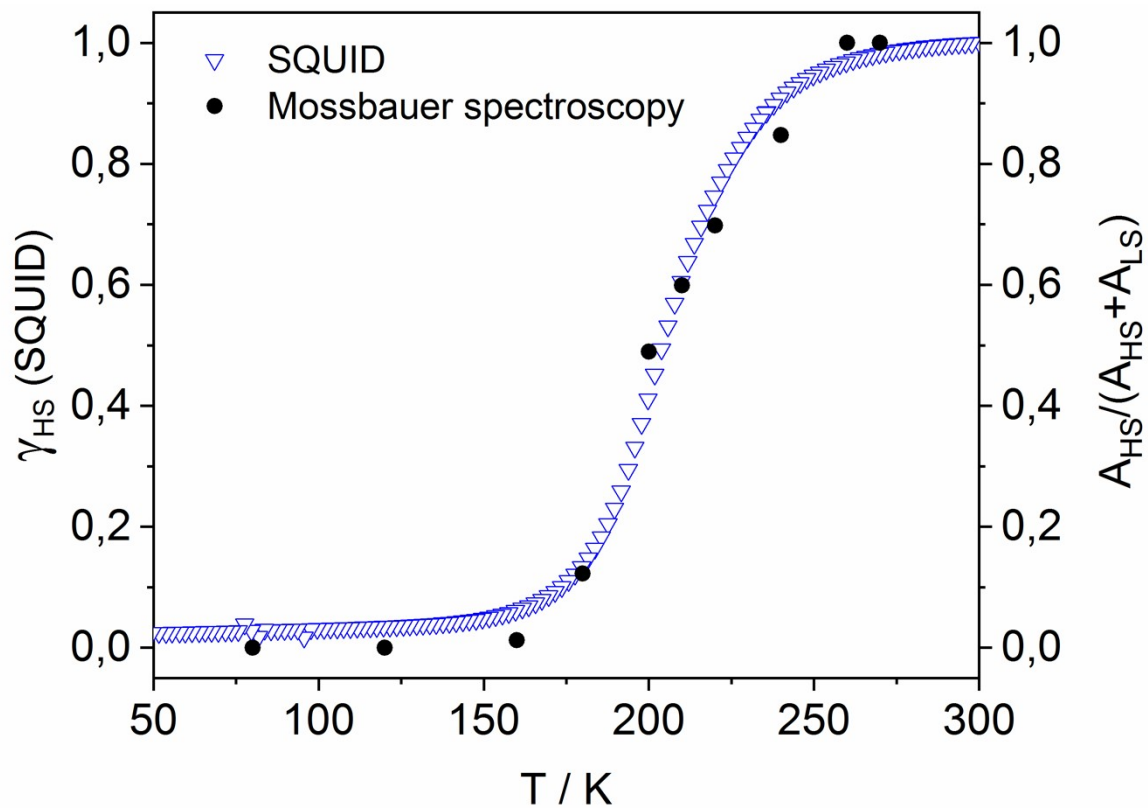

**Figure S5.**  $\gamma_{HS}(T)$  derived from magnetic studies (SQUID, cooling mode, blue open triangles) and relative area  $A_{HS}/(A_{HS}+A_{LS})$  vs. T dependence (Mössbauer spectroscopy, cooling mode, black circles) for **1c**.  $A_{HS}$  (right axis label) denotes a sum of  $A_{HS1}$  and  $A_{HS2c}$  areas.



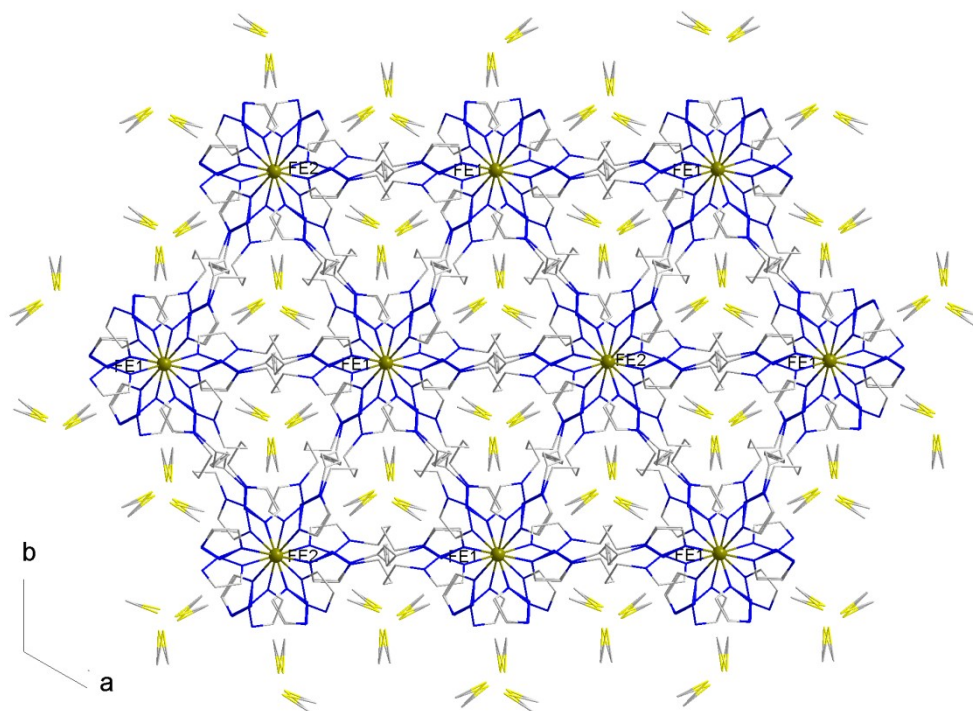

**Figure S6.** View along *c* axis of three adjusted layers in **1** (300 K).

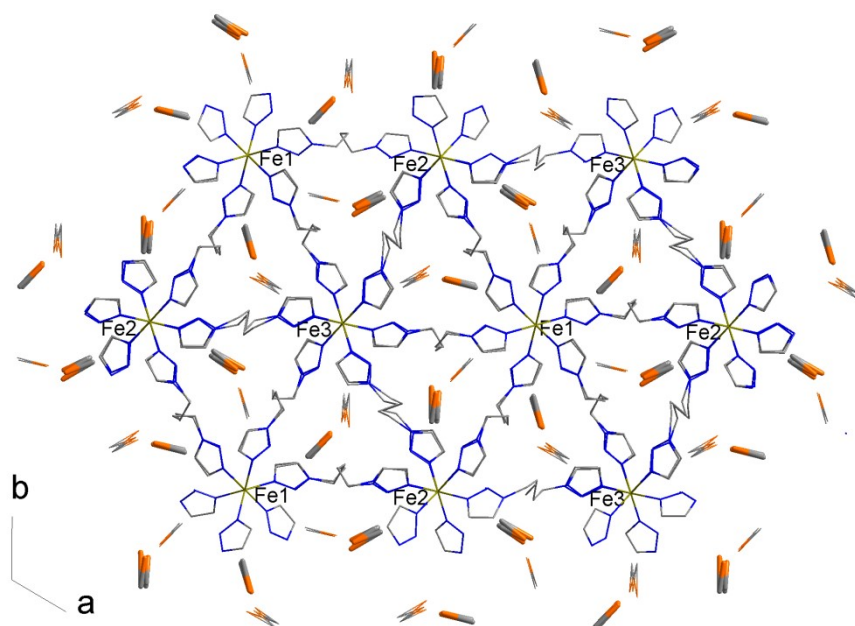

**Figure S7.** View along *c* axis of three adjusted layers in **1c** (view along *c* direction) at 280 K.

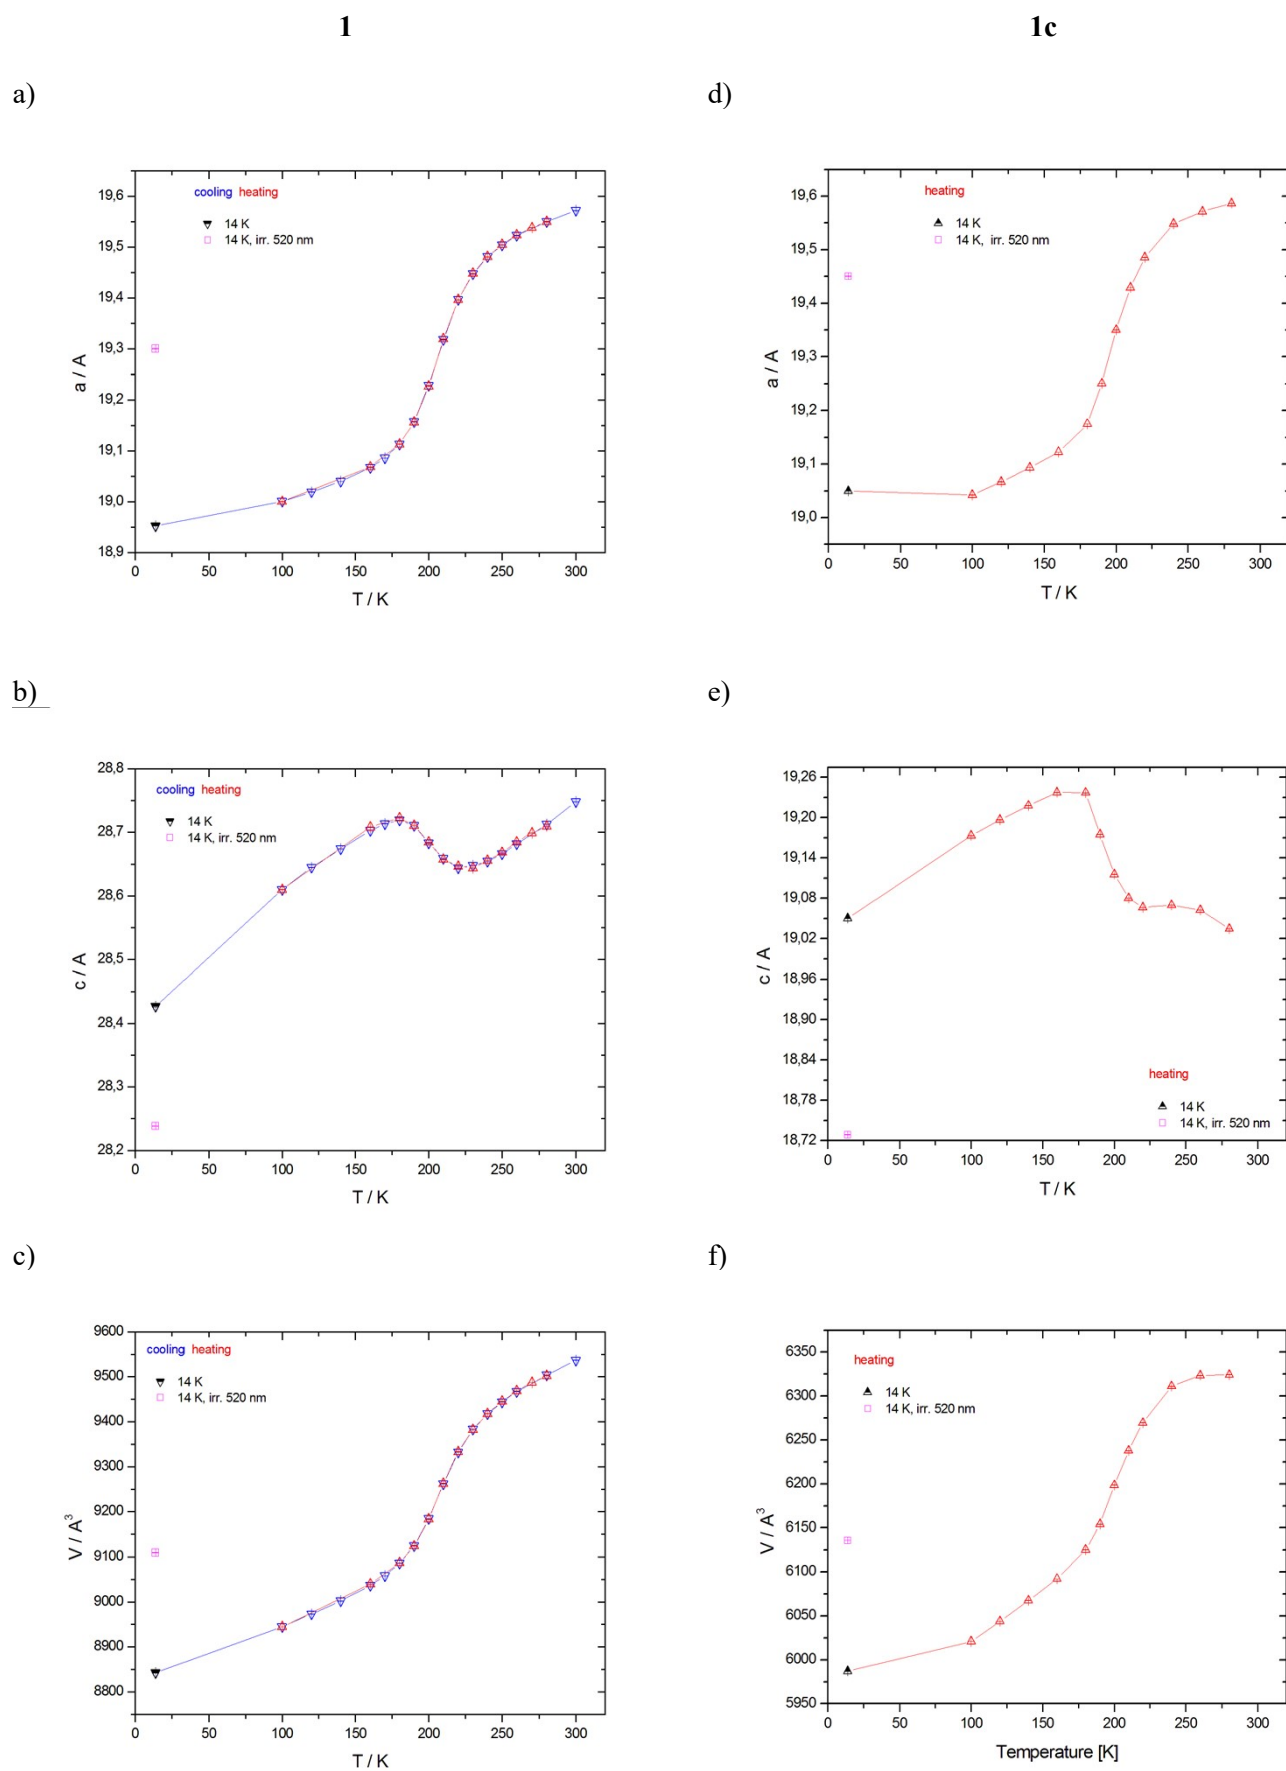

**Figure S8.** Temperature dependence of unit cell parameters for **1** (left column) and **1c** (right column).

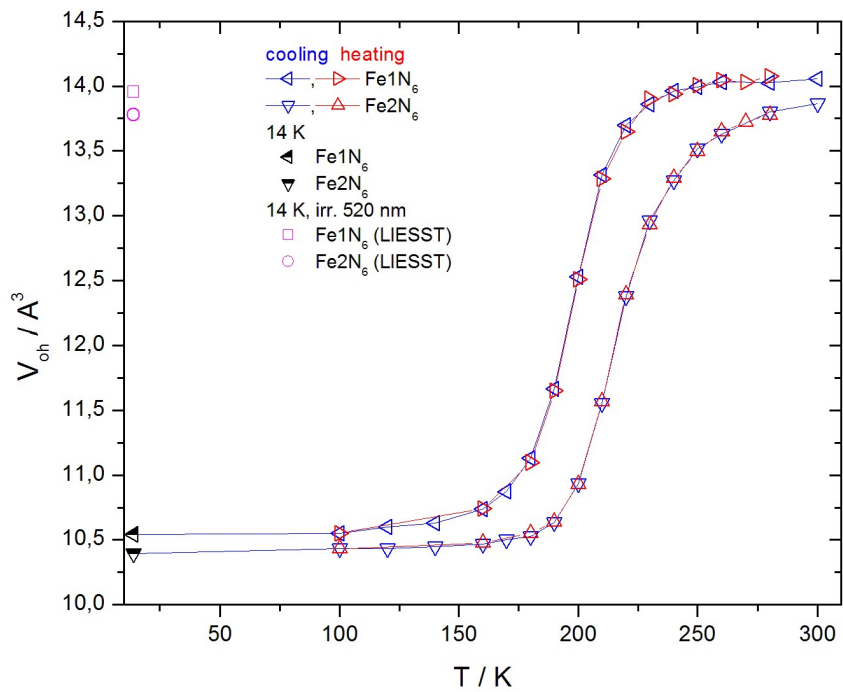

a)

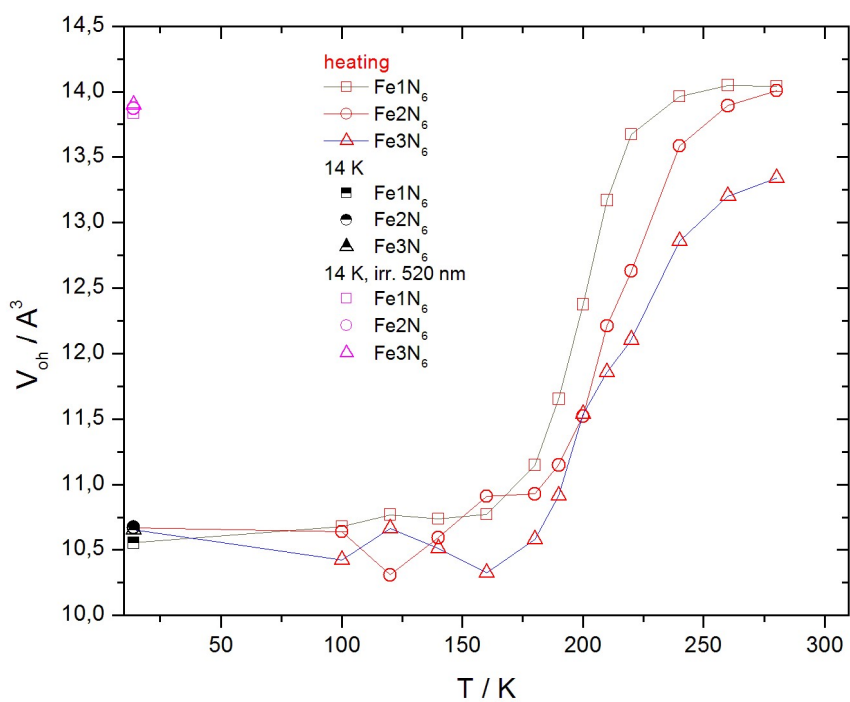

b)

**Figure S9.** Temperature dependence of [FeN<sub>6</sub>] octahedral volumes  $V_{\text{oh}}$  for **1** (a) and **1c** (b).

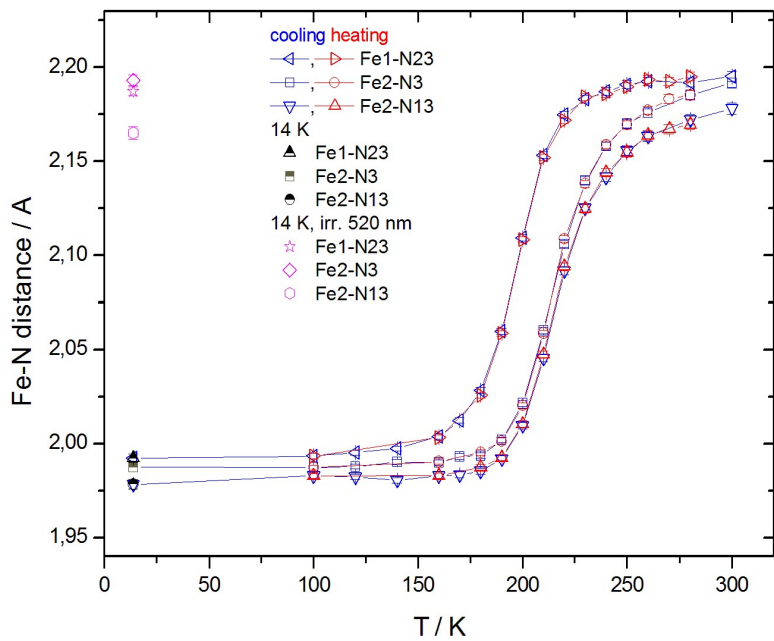

a)

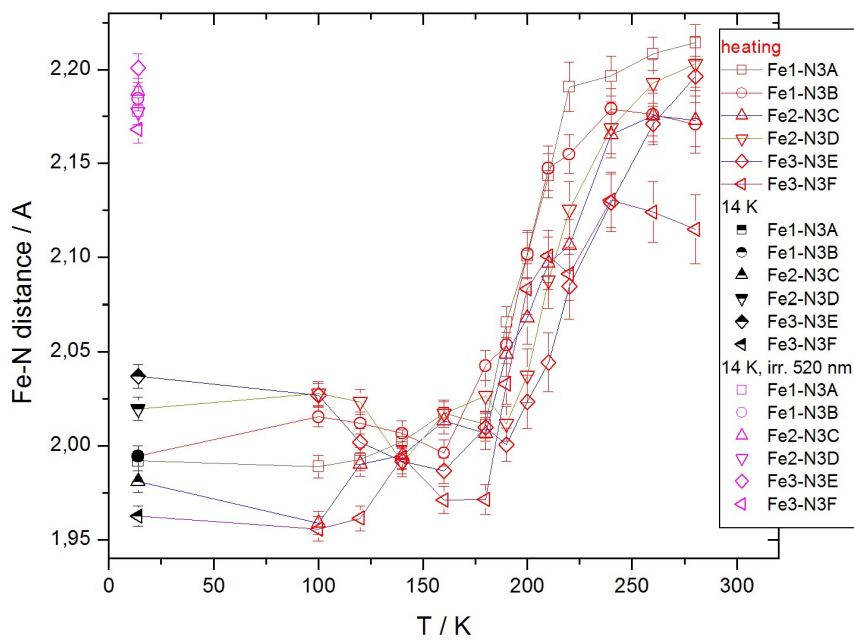

b)

Figure S10. Temperature dependence of the Fe-N distances for **1** (a) and **1c** (b).
